RESEARCH ARTICLE

# Maternal varicella antibodies in children aged less than one year: Assessment of antibody decay

Shelly Bolotin<sup>1,2,3,4,\*</sup>, Stephanie L. Hughes<sup>1</sup>, Rachel D. Savage<sup>1,2</sup>, Elizabeth McLachlan<sup>5,6</sup>, Alberto Severini<sup>5,6</sup>, Callum Arnold<sup>7</sup>, Susan Richardson<sup>8</sup>, Natasha S. Crowcroft<sup>2,3,4,9</sup>, Shelley Deek<sup>1,2</sup>, Scott A. Halperin<sup>10</sup>, Kevin A. Brown<sup>1,2</sup>, Todd Hatchette<sup>10</sup>, Selma Osman<sup>1</sup>, Jonathan B. Gubbay<sup>1,4,7,11</sup>, Michelle Science<sup>1,7,11,12</sup>

**1** Public Health Ontario, Toronto, Ontario, Canada, **2** Dalla Lana School of Public Health, University of Toronto, Toronto, Ontario, Canada, **3** Centre for Vaccine Preventable Diseases, University of Toronto, Toronto, Ontario, Canada, **4** Department of Laboratory Medicine and Pathobiology, University of Toronto, Toronto, Ontario, Canada, **5** National Microbiology Laboratory, Public Health Agency of Canada, Ottawa, Ontario, Canada, **6** Department of Medical Microbiology, University of Manitoba, Manitoba, Canada, **7** Division of Infectious Diseases, The Hospital for Sick Children, Toronto, Ontario, Canada, **8** Division of Microbiology, The Hospital for Sick Children, Toronto, Ontario, Canada, **9** Department of Immunization, Vaccines & Biologicals, World Health Organization, Geneva, Switzerland, **10** Canadian Center for Vaccinology (CCfV), IWK Health Centre, Nova Scotia Health (NSH), and Dalhousie University, Halifax, Nova Scotia (NS), Canada, **11** Department of Paediatrics, University of Toronto, Toronto, Ontario, Canada, **12** Department of Paediatrics, The Hospital for Sick Children, Toronto, Ontario, Canada

\* [shelly.bolotin@oahpp.ca](mailto:shelly.bolotin@oahpp.ca)

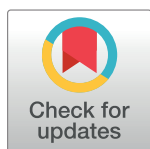

## OPEN ACCESS

**Citation:** Bolotin S, Hughes SL, Savage RD, McLachlan E, Severini A, Arnold C, et al. (2023) Maternal varicella antibodies in children aged less than one year: Assessment of antibody decay. PLoS ONE 18(11): e0287765. <https://doi.org/10.1371/journal.pone.0287765>

**Editor:** Ray Borrow, Public Health England, UNITED KINGDOM

**Received:** October 24, 2022

**Accepted:** June 13, 2023

**Published:** November 10, 2023

**Copyright:** © 2023 Bolotin et al. This is an open access article distributed under the terms of the [Creative Commons Attribution License](https://creativecommons.org/licenses/by/4.0/), which permits unrestricted use, distribution, and reproduction in any medium, provided the original author and source are credited.

**Data Availability Statement:** All relevant data are within the manuscript and its [Supporting information](#) files.

**Funding:** This work was funded by the Public Health Ontario Project Initiation Fund to SB. The funder had no role in study design, data collection and analysis, decision to publish, or preparation of the manuscript.

**Competing interests:** The authors have declared that no competing interests exist.

## Abstract

### Objectives

To investigate maternal antibody levels to varicella in infants <12 months of age in Ontario, Canada.

### Study design

In this study, we included specimens from infants <12 months of age, born at  $\geq 37$  weeks gestational age, who had sera collected at The Hospital for Sick Children (Toronto, Canada) between 2014–2016. We tested sera using a glycoprotein-based enzyme-linked immunosorbent assay (gpELISA). We measured varicella susceptibility (antibody concentration <150 mIU/mL) and mean varicella antibody concentration, and assessed the probability of susceptibility and concentration between one and 11 months of age using multivariable logistic regression and Poisson regression.

### Results

We found that 32% of 196 included specimens represented infants susceptible to varicella at one month of age, increasing to nearly 80% at three months of age. At six months of age, all infants were susceptible to varicella and the predicted mean varicella antibody concentration declined to 62 mIU/mL (95% confidence interval 40, 84), well below the threshold of protection.

## Conclusions

We found that varicella maternal antibody levels wane rapidly in infants, leaving most infants susceptible by four months of age. Our findings have implications for the timing of first dose of varicella-containing vaccine, infection control measures, and infant post-exposure prophylaxis recommendations.

## Introduction

Varicella-zoster virus (VZV or human herpesvirus 3) causes chickenpox as a primary infection, and can reactivate from the ganglionic neurons after a variable latency period as herpes zoster, commonly known as shingles [1]. In temperate climates and in the absence of vaccination programs, varicella incidence is highest in children under 10 years of age, with over 90% of children infected before adolescence [2]. VZV is highly transmissible, and is most infectious 1–2 days prior to the onset of rash [2]. The household secondary attack rate in susceptible individuals ranges from 61–100% in temperate climates [2]. Infections during early childhood are usually self-limiting and generally lead to life-long immunity [3], but complications including bacterial skin infections, pneumonia, febrile convulsions, and encephalitis can occur, with young children being the most vulnerable [4, 5].

Prior to routine vaccination, varicella incidence in Canada was estimated at 350,000 cases per year (11.7 per 1,000 population)[6]. Although authorized in Canada in 1998 [7], varicella vaccine was only privately available until it was added to Provincial and Territorial vaccination programs from 2000–2007 [6, 8]. In Ontario, one dose of varicella vaccine became publicly available for administration at 15 months of age in 2004, with a second dose added in 2011 for children aged four to six years [7]. Individuals born since 2000 are eligible for vaccination. Implementation of a vaccine program in Ontario dramatically decreased reported disease incidence, medically attended disease, and hospitalization compared to the pre-vaccine era, even in age-groups that were not eligible for vaccination [7, 9].

Infants are especially vulnerable to severe disease and complications, and have the highest rate of hospitalization of all age-groups [9, 10]. They can be exposed to varicella in the home, at daycare or playgroups, and in hospital and outpatient healthcare settings [5, 10–12]. Infants receive maternal antibodies transplacentally and, if born to varicella-immune mothers, are protected at birth [13]. However, maternal antibody levels in infants decay over time, leaving them vulnerable to varicella infection in their first year of life [13–15].

The objective of our study was to assess varicella maternal antibody decay in infants in the first year of life in Ontario, Canada.

## Methods

### Population and study design

We included sera collected from infants <12 months between January 1, 2014 and December 31, 2016 as part of clinical testing of infants who were admitted to hospital or seen in the emergency department or outpatient clinics at The Hospital for Sick Children, a large paediatric tertiary care hospital in Toronto, Ontario, Canada. Lists of previously collected available sera were provided from the laboratory at the Hospital for Sick Children in random order, and up to 25 sera were randomly selected from each of eight age-groups: 0 months (0–30 days (d)), 1 month (31–60 d), 2 months (61–89 d), 3 months (90–119 d), 4 months, 5 months, 6–8 months

and 9–11 months for serological testing for VZV antibodies. We excluded sera from infants born at <37 weeks gestational age; those with a suspected or confirmed immune deficiency or an underlying condition associated with reduced antibody counts; those that had received intravenous immune globulin, intramuscular immune globulin or blood transfusions; those previously diagnosed with varicella infection; or who have received varicella immunization. We extracted demographic and clinical data on the infants from the hospital patient information system.

### Laboratory testing

We performed serology testing at the National Microbiology Laboratory in Winnipeg, Manitoba, Canada using the VaccZyme glycoprotein IgG enzyme immunoassay (gpELISA) (The Binding Site Group, Birmingham, United Kingdom), which was previously validated by our group [16]. The assay range is 10–810 mIU/mL, but higher values can be extrapolated from the standards. We defined any samples with antibody results of <150 mIU/mL as susceptible, according to the manufacturer's instructions, based on agreement with time resolved fluorescence immunoassay (TRFIA) and Merck VZV assays [14, 17, 18].

### Epidemiological analysis

We performed all analyses in Stata v12.1. We summarized continuous data using means and standard deviations, or medians and ranges. We used Chi-squared tests to assess the statistical significance of differences between proportions, and a Cochran-Armitage Chi-squared test to test for statistically significant (linear) trends.

To assess the association between infant age and varicella susceptibility, we used multivariable logistic regression with a forward-fitting approach, including infant sex and maternal age *a priori*. We screened other covariates for inclusion using a Chi-squared or Student's *t* test if  $p < 0.20$ . To predict the probability of varicella susceptibility by infant age, we calculated adjusted marginal predictions by infant month of age (as opposed to by age-group, as for the descriptive analysis) using the “margins” command in Stata. We estimated this using the average maternal age for the study, as well as maternal age of 25, 30, 35 and 40 years. To assess model fit, we used the Hosmer-Lemeshow goodness-of-fit test using 5 groups.

To model mean varicella antibody concentration by infant age, we used multivariable Poisson regression with robust standard errors, using a forward-fitting approach as described previously [19]. To address the non-linear relationship between infant age and antibody concentration, we modeled infant age using restricted cubic spline terms with five knots placed at the 5<sup>th</sup> (age 0.4 months), 27.5<sup>th</sup> (2.1 months), 50<sup>th</sup> (4.0 months), 72.5<sup>th</sup> (5.7 months), and 95<sup>th</sup> percentiles (11.0 months). To predict mean antibody concentration by infant age, we calculated the adjusted marginal predictions of infant mean varicella antibody concentrations using the average maternal age for the study, as well as maternal age of 25, 30, 35 and 40 years.

To address missing data that were not available in the hospital's patient information system, we used single random regression imputation to fill in missing data in the maternal age and breastfeeding status variables under the missing-at-random assumption. We performed a sensitivity analysis restricting observations only to infants who had complete data for these predictors (i.e.—complete case analysis) for both models. We presented all estimates using 95% confidence intervals (95% CI).

### Ethics

The study was approved by The Hospital for Sick Children Research Ethics Board and the Public Health Ontario Ethics Review Board. As part of the Hospital for Sick Children Ethics Board

review, we obtained a standard waiver for secondary use of existing biological specimens. This waiver allows for retrospective testing of existing serological samples when the results are unlikely to affect the welfare of persons to whom the information relates, and it is impossible or impracticable to seek consent from persons from whom the material was collected. These conditions and all others that satisfy Canada's Tri-Council Policy Statement on the Ethical Conduct for Research Involving Humans were deemed to have been met.

## Results

We tested 196 sera for our study, representing 187 infants. Nine infants contributed two sera samples collected at two different time points. Of the tested specimens, 56% were from males and 35% were from infants with underlying conditions, which were most commonly either central nervous system conditions/developmental delays, or gastrointestinal/liver conditions (Table 1). Detailed characteristics of the 196 sera can be found in a previous publication [19]. The mean and median maternal age at the time of specimen collection was 32 years (standard deviation 6, range 18–47).

### Infant varicella susceptibility

The proportion of samples from infants susceptible to varicella increased with each increasing infant month of age ( $p < 0.001$ , Cochran-Armitage test for trend  $p < 0.0001$ ) (Table 1). Before one month of age, 8% (2/25) were susceptible to varicella, increasing to 54.2% (13/24) by two months of age, and to 100% by six months of age. Infant susceptibility was not found to differ significantly by sex ( $p = 0.70$ ), gestational age ( $p = 0.22$ ), breastfeeding status ( $p = 0.98$ ), or by mean maternal age ( $p = 0.48$ ). A higher proportion of infants with an underlying condition were susceptible to varicella compared to those without such conditions (73.9% or 51/69 vs. 59.8% or 76/127,  $p = 0.05$ ). There was a statistically significant difference between the proportion of samples from susceptible infants who were inpatients (66.3% or 61/92), outpatients (59.1% or 55/93) or those seen in the emergency department (100% or 11/11) ( $p = 0.03$ ).

### Predictors of infant varicella susceptibility

For each month increase in infant age, the odds of varicella susceptibility nearly doubled (unadjusted odds ratio (OR) = 1.98, 95% CI 1.61, 2.43). After forward stepwise logistic regression, no other variables were eligible for inclusion other than those selected *a priori* (Table 2). After adjusting for infant sex and maternal age (with imputation), the association remained unchanged (adjusted OR = 1.99, 95% CI 1.61, 2.45). Results were similar when we adjusted for infant sex and maternal age using complete case analysis ( $n = 100$ ) (adjusted OR = 1.94, 95% CI 1.46, 2.57).

We predicted the probability of infant varicella susceptibility by age, using the mean maternal age in the study (32 years) and controlling for infant sex. We found that the probability of susceptibility was 24% (95% CI 14%, 34%) at one month of age, increasing to 71% (95% CI 63%, 80%) by four months and to 97% (95% CI 95%, 100%) at eight months (Fig 1, S1 Table).

We observed a modest inverse relationship between maternal age and the probability of infant susceptibility (S1 Fig). For example, the probability of varicella susceptibility in a one month old infant was approximately 20% if their mother was 40 years of age, but almost 30% if their mother was 25 years of age. However, maternal age did not significantly contribute to the odds of susceptibility in our logistic regression model (Table 2).

Table 1. Characteristics of study population (N = 196).

| Variable                                            | Overall (N = 196) n | Susceptible (n = 127) n (%) | Immune (n = 69) n (%) | P-value |
|-----------------------------------------------------|---------------------|-----------------------------|-----------------------|---------|
| Infant age (months)                                 |                     |                             |                       |         |
| 0                                                   | 25                  | 2 (8.0)                     | 23 (92.0)             | <0.001  |
| 1                                                   | 25                  | 8 (32.0)                    | 17 (68.0)             |         |
| 2                                                   | 24                  | 13 (54.2)                   | 11 (45.8)             |         |
| 3                                                   | 24                  | 19 (79.2)                   | 5 (20.8)              |         |
| 4                                                   | 24                  | 17 (70.8)                   | 7 (29.2)              |         |
| 5                                                   | 25                  | 20 (80.0)                   | 5 (20.0)              |         |
| 6–8                                                 | 25                  | 25 (100.0)                  | 0 (0.0)               |         |
| 9–11                                                | 24                  | 23 (95.8)                   | 1 (4.2)               |         |
| Mean infant age in months (SD)                      | 4 (3)               | 6 (3)                       | 2 (2)                 | <0.0001 |
| Infant sex                                          |                     |                             |                       |         |
| Male                                                | 110                 | 70 (63.6)                   | 40 (36.4)             | 0.70    |
| Female                                              | 86                  | 57 (66.3)                   | 29 (33.7)             |         |
| Underlying condition                                |                     |                             |                       |         |
| Yes                                                 | 69                  | 51 (73.9)                   | 18 (26.1)             | 0.05    |
| No                                                  | 127                 | 76 (59.8)                   | 51 (40.2)             |         |
| Admission setting                                   |                     |                             |                       |         |
| Inpatient                                           | 92                  | 61 (66.3)                   | 31 (33.7)             | 0.03    |
| Outpatient                                          | 93                  | 55 (59.1)                   | 38 (40.9)             |         |
| Emergency department                                | 11                  | 11 (100.0)                  | 0 (0.0)               |         |
| Gestational age (weeks) <sup>a</sup>                |                     |                             |                       |         |
| 37                                                  | 21                  | 14 (66.7)                   | 7 (33.3)              | 0.22    |
| 38                                                  | 28                  | 21 (75.0)                   | 7 (25.0)              |         |
| 39                                                  | 35                  | 19 (54.3)                   | 16 (45.7)             |         |
| 40                                                  | 21                  | 10 (47.6)                   | 11 (52.4)             |         |
| ≥41                                                 | 24                  | 17 (70.8)                   | 7 (29.2)              |         |
| Any breast feeding <sup>b</sup>                     |                     |                             |                       |         |
| Yes                                                 | 79                  | 44 (55.7)                   | 35 (44.3)             | 0.98    |
| No                                                  | 25                  | 14 (56.0)                   | 11 (44.0)             |         |
| Mean maternal age <sup>c</sup> in years (SD, range) | 32 (6, 18–47)       | 32 (6, 18–45)               | 33 (6, 22–47)         | 0.48    |
| GMC (mIU/mL)                                        | 95                  | 39                          | 488                   |         |

SD, standard deviation. GMC, geometric mean concentration.

A—excludes 67 missing; b—excludes 92 missing; c—excludes 96 missing.

<https://doi.org/10.1371/journal.pone.0287765.t001>

Table 2. Crude and adjusted logistic regression analysis of the association between infant age and susceptibility to varicella.

| Variable                           | Unadjusted |            | Adjusted (Imputed) |            | Adjusted (Complete-case) |            |
|------------------------------------|------------|------------|--------------------|------------|--------------------------|------------|
|                                    | (N = 196)  |            | (N = 196)          |            | (N = 100)                |            |
|                                    | OR         | 95% CI     | OR                 | 95% CI     | OR                       | 95% CI     |
| Infant age (per 1-month increase)  | 1.98       | 1.61, 2.43 | 1.99               | 1.61, 2.45 | 1.94                     | 1.46, 2.57 |
| Maternal age (per 1-year increase) | —          | —          | 0.97               | 0.92, 1.04 | 0.96                     | 0.87, 1.05 |
| Infant sex (female)                | —          | —          | 0.92               | 0.43, 1.95 | 0.92                     | 0.32, 2.59 |

<https://doi.org/10.1371/journal.pone.0287765.t002>

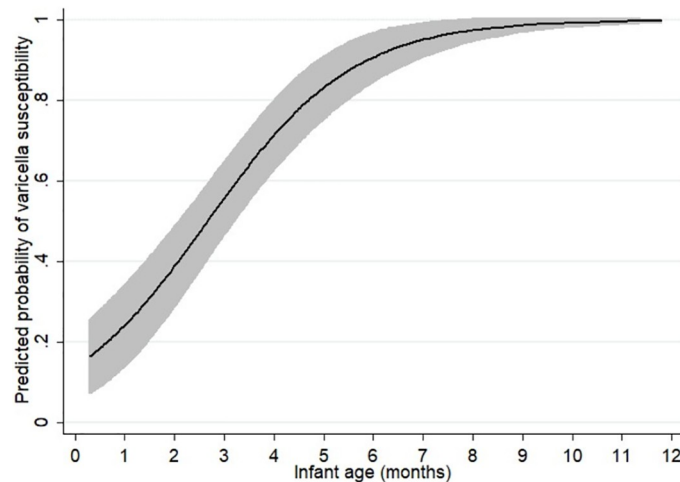

**Fig 1. Predicted probability of varicella susceptibility by infant age, for mothers aged 32 years, based on a logistic model controlling for infant sex and maternal age.** The shaded area represents 95% CIs.

<https://doi.org/10.1371/journal.pone.0287765.g001>

### Infant varicella antibody levels

Varicella antibody concentrations at birth varied greatly, ranging from concentrations under the threshold of protection to very high concentrations >1000 mIU/mL (Fig 2). Controlling for infant sex and maternal age and using the average maternal age in the study (32 years), the predicted mean varicella antibody concentration in infants one month and four months of age was 584 mIU/mL (95% CI 471, 698) and 135 mIU/mL (95% CI 88, 182), respectively (S2 Fig, S1 Table). By six months of age, the predicted mean varicella antibody concentration declined to 62 mIU/mL (95% CI 40, 84), well below the threshold of 150 mIU/mL.

We found that infant antibody concentrations increased slightly with maternal age (S3 Fig), although overall predicted concentrations were similar across the range of maternal ages.

### Discussion

In this study of 196 infant sera, we found that maternally acquired antibodies to varicella waned rapidly in the first 12 months of life. More than half of the specimens from infants two months of age and all specimens from infants six months of age were found to be susceptible to varicella. Our findings highlight a large gap in protection between the time when infants lose maternal antibody-mediated protection and eligibility for a first varicella vaccine dose, which occurs at either 12 or 15 months of age (depending on the province/territory) in Canada, at 12–15 months in the United States, and at 18 months in Australia [7, 20–22]. This susceptibility gap is similar albeit slightly wider than described in studies performed in varicella-endemic settings, in which the majority of infants were susceptible to varicella by 3–6 months of age [23], and all were susceptible by nine months of age [24]. This wide susceptibility gap is concerning because while most varicella infections are self-limiting, case fatality rates in infants are four times higher than in older children [10], and clinical complications upon infection are inversely correlated to varicella antibody levels [24]. As a result, our findings have important implications for post-exposure management of exposed infants. Varicella vaccine is not recommended for administration in infants <12 months in all jurisdictions, and therefore cannot be used for post-exposure prophylaxis [25], and immune globulin is not generally recommended unless the infant has a mother that is infected with varicella within a certain time

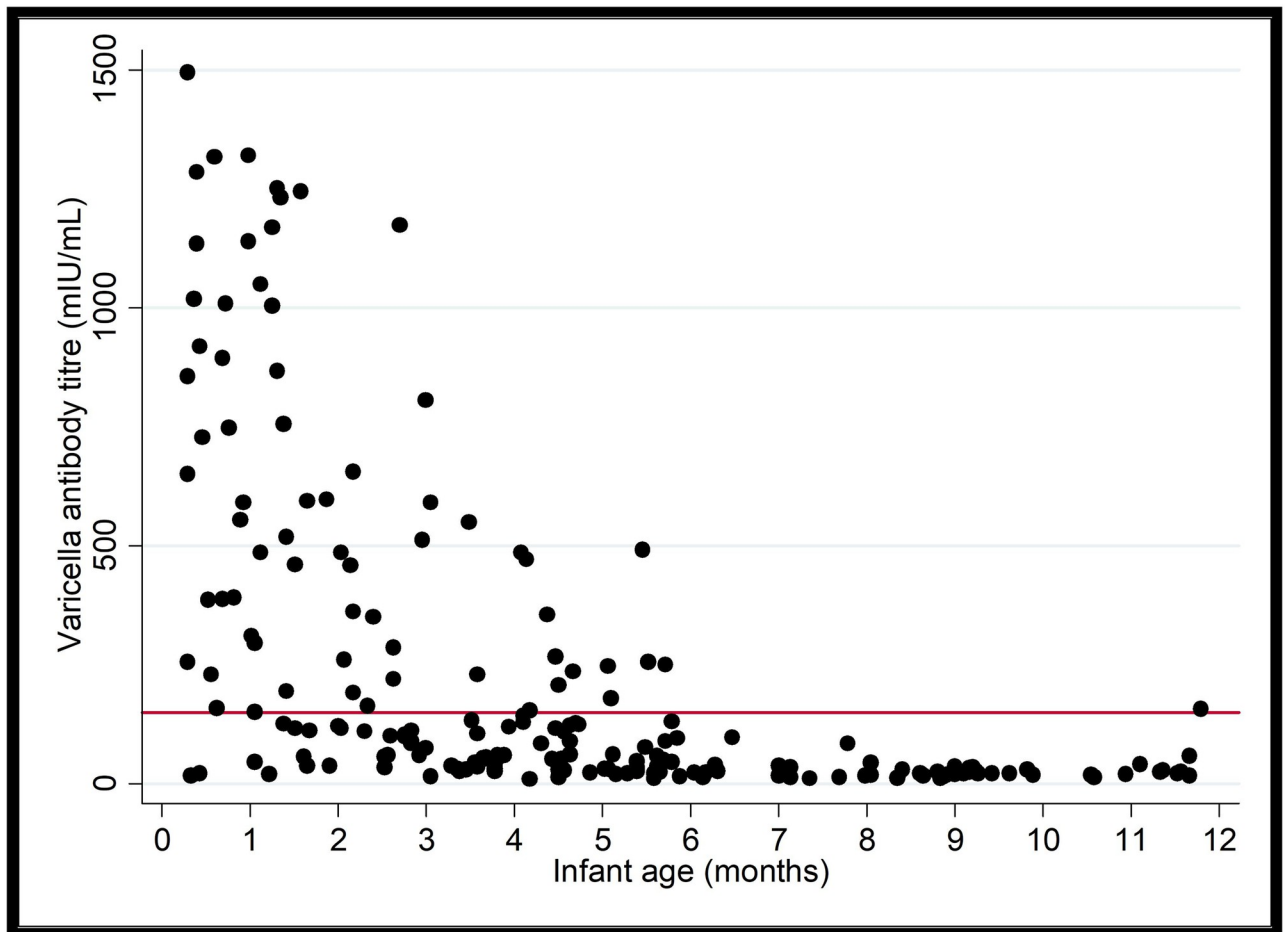

**Fig 2.** Scatterplot of the relationship between infant age in months and their varicella antibody concentration in mIU/mL (N = 196). We considered infants above the threshold (red line, 150mIU/mL) to be immune to varicella infection, and those below the threshold to be susceptible to varicella infection.

<https://doi.org/10.1371/journal.pone.0287765.g002>

period [26], the infant is premature and in intensive care, or is immunocompromised [25, 27, 28]. Since post-exposure prophylaxis options are limited, exclusion and isolation protocols are of greater importance to prevent transmission. However, infants less than six months are often assumed to be immune to varicella based on maternal immunity. That assumption could lead to exposures of vulnerable infants, since our findings suggest most are susceptible by four months of age.

Our findings are also important with regards to the timing of the first dose of varicella vaccine, which balances the risk of varicella infection with the presence of maternal antibodies, since the latter can interfere with the infant immune response to vaccine. The duration of infant immunity correlates to maternal antibody concentration [14, 15], but several factors can affect varicella antibody levels in mothers. Decreased circulation of varicella in some jurisdictions [9, 29] may lead to decreased immunological boosting and antibody waning in mothers [30], leading to earlier waning of maternal protection in their infants. Studies have shown mixed results regarding the waning of infection-induced vs. vaccine-induced antibodies against varicella [31] [32–37], and while none of the mothers in this study were vaccinated, the consequence of maternal varicella vaccination on infant immunity requires further study.



## Limitations

Our analysis was limited by inclusion of infants from a single tertiary care pediatric hospital, who represent an urban population. There were missing data on maternal age and breastfeeding status. For the latter, the lack of more detailed data on extent of and duration of breastfeeding is a limitation. Our retrospective study design did not allow collection of other maternal data variables, like varicella immunity status or place of birth, or the collection of maternal sera to assess the correlation between infant and maternal antibody levels. Furthermore, the specimens were collected in 2014–2016, at a time when individuals of childbearing age were mostly immune through previous infection, and not vaccination. In future studies, sampling both the mother and infant would capture a more complete picture of maternal risk factors for infant susceptibility. Lastly, although antibody levels generally correlate to immunity [38], this correlation is usually observed in individuals that also have cellular immunity to varicella [39]. It is therefore not clear whether all seropositive infants in this study, who have no varicella cellular immunity, are truly protected from infection.

## Conclusions

In summary, our results suggest that parents, clinicians and policy makers should be aware of potential infant susceptibility to varicella. Our findings can inform hospital isolation protocols to limit transmission to vulnerable infants, by ensuring that immunity testing and not age-based considerations determine whether infants are considered protected from varicella. Further research may be required to optimize vaccination schedules, specifically to investigate the effect of age on varicella vaccine effectiveness in order to understand whether earlier administration of the first varicella vaccine dose would affect protection later in life. In the meantime, infant exposure would best be minimized by increasing population immunity to varicella through high vaccine coverage in eligible groups, family members in close contact with infants, and vaccination of susceptible women of childbearing age to reduce the burden of disease in infants as well as congenital varicella syndrome [40].

## Supporting information

**S1 Fig. Predicted logistic regression probability of varicella susceptibility by infant age, controlling for infant sex and maternal age, for mothers aged 25, 30, 35 and 40 years.**  
(TIF)

**S2 Fig. Predicted mean varicella antibody concentrations by infant age, controlling for sex, for mothers aged 32 years, based on a Poisson regression model.** The shaded area represents 95% CIs.  
(TIF)

**S3 Fig. Predicted poisson regression mean varicella antibody concentrations by infant age, controlling for infant sex and maternal age, for mothers aged 25, 30, 35 and 40 years.**  
(TIF)

**S1 Table. Predicted probability of infant varicella susceptibility and predicted mean varicella antibody concentration, adjusted for infant sex and maternal age, and assuming a maternal age of 32 years.**  
(DOCX)



## Author Contributions

**Conceptualization:** Shelly Bolotin, Stephanie L. Hughes, Rachel D. Savage, Elizabeth McLachlan, Alberto Severini, Susan Richardson, Natasha S. Crowcroft, Shelley Deek, Scott A. Halperin, Todd Hatchette, Michelle Science.

**Data curation:** Kevin A. Brown.

**Formal analysis:** Stephanie L. Hughes, Alberto Severini, Kevin A. Brown, Michelle Science.

**Funding acquisition:** Shelly Bolotin, Michelle Science.

**Investigation:** Shelly Bolotin, Stephanie L. Hughes, Rachel D. Savage, Elizabeth McLachlan, Alberto Severini, Callum Arnold, Todd Hatchette, Michelle Science.

**Methodology:** Shelly Bolotin, Stephanie L. Hughes, Elizabeth McLachlan, Alberto Severini, Natasha S. Crowcroft, Shelley Deek, Scott A. Halperin, Todd Hatchette, Jonathan B. Gubbay, Michelle Science.

**Project administration:** Shelly Bolotin, Elizabeth McLachlan, Alberto Severini, Selma Osman.

**Resources:** Alberto Severini, Todd Hatchette, Michelle Science.

**Supervision:** Shelly Bolotin, Elizabeth McLachlan, Susan Richardson, Todd Hatchette, Michelle Science.

**Validation:** Elizabeth McLachlan.

**Writing – original draft:** Shelly Bolotin, Michelle Science.

**Writing – review & editing:** Shelly Bolotin, Stephanie L. Hughes, Rachel D. Savage, Elizabeth McLachlan, Alberto Severini, Callum Arnold, Susan Richardson, Natasha S. Crowcroft, Shelley Deek, Scott A. Halperin, Kevin A. Brown, Todd Hatchette, Selma Osman, Jonathan B. Gubbay, Michelle Science.

## References

1. Gershon AA. Is chickenpox so bad, what do we know about immunity to varicella zoster virus, and what does it tell us about the future? *J Infect.* 2017; 74 Suppl 1: S27–S33. [https://doi.org/10.1016/S0163-4453\(17\)30188-3](https://doi.org/10.1016/S0163-4453(17)30188-3) PMID: 28646959
2. Vaccines SWG on V and HZ. Background Paper on Varicella Vaccine.
3. Lopez, Adriana, Harrington, Theresa, Marin M. Varicella. 2021. <https://www.cdc.gov/vaccines/pubs/pinkbook/varicella.html>
4. Bernal JL, Hobbelen P, Amirthalingam G. Burden of varicella complications in secondary care, England, 2004 to 2017. *Euro Surveill.* 2019; 24: 1900233. <https://doi.org/10.2807/1560-7917.ES.2019.24.42.1900233> PMID: 31640840
5. Gowin E, Wysocki J, Michalak M, Januszkiewicz-Lewandowska D. Too young to be vaccinated: hospitalizations caused by varicella among children in the first year of life. *International Journal of Infectious Diseases.* 2017; 62: 52–55. <https://doi.org/10.1016/j.ijid.2017.07.009> PMID: 28735059
6. Campbell A, Ismail S, Tan B, NACI. approved by. Literature Review on One-Dose and Two-Dose Varicella Vaccination: An Advisory Committee Statement (ACS) National Advisory Committee on Immunization (NACI)(†). *Can Commun Dis Rep.* 2010; 36: 1–24. <https://doi.org/10.14745/ccdr.v36i00a10> PMID: 31682662
7. Harris T, Seo CY, Shing E, Wong K, Fediurek J, Deeks SL. A spot of bother: Why varicella vaccine programs matter. *Can Commun Dis Rep.* 2015; 41: 241–249. <https://doi.org/10.14745/ccdr.v41i10a04> PMID: 29769919
8. NACI Statement: Varicella vaccination recommendations. In: CCDDR [Internet]. 2010. <https://www.canada.ca/en/public-health/services/reports-publications/canada-communicable-disease-report-ccdr/monthly-issue/2010-36/canada-communicable-disease-report-13.html>

9. Wormsbecker AE, Wang J, Rosella LC, Kwong JC, Seo CY, Crowcroft NS, et al. Twenty years of medically-attended pediatric varicella and Herpes Zoster in Ontario, Canada: a population-based study. *PLoS One*. 2015; 10: e0129483. <https://doi.org/10.1371/journal.pone.0129483> PMID: 26177077
10. Heininger U, Seward JF. Varicella. *The Lancet*. 2006; 368: 1365–1376. [https://doi.org/10.1016/S0140-6736\(06\)69561-5](https://doi.org/10.1016/S0140-6736(06)69561-5) PMID: 17046469
11. Lécuyer A, Levy C, Gaudelus J, Floret D, Soubeyrand B, Caulin E, et al. Hospitalization of newborns and young infants for chickenpox in France. *Eur J Pediatr*. 2010/05/12. 2010; 169: 1293–1297. <https://doi.org/10.1007/s00431-010-1212-9> PMID: 20461528
12. Friedman CA, Temple DM, Robbins KK, Rawson JE, Wilso JP F S. Outbreak and control of varicella in a neonatal intensive care unit. *Pediatr Infect Dis J*. 1994; 13: 152–4. PMID: 8190542
13. Waaijenborg S, Hahne SJ, Mollema L, Smits GP, Berbers GA, van der Klis FR, et al. Waning of maternal antibodies against measles, mumps, rubella, and varicella in communities with contrasting vaccination coverage. *J Infect Dis*. 2013; 208: 10–16. <https://doi.org/10.1093/infdis/jit143> PMID: 23661802
14. Leuridan E, Hens N, Hutse V, Aerts M, Van Damme P. Kinetics of maternal antibodies against rubella and varicella in infants. *Vaccine*. 2011; 29: 2222–2226. <https://doi.org/10.1016/j.vaccine.2010.06.004> PMID: 20558248
15. van der Zwet WC, Vandenbroucke-Grauls CMJE, van Elburg RM, Cranendonk A, Zaaijer HL. Neonatal Antibody Titers Against Varicella-Zoster Virus in Relation to Gestational Age, Birth Weight, and Maternal Titer. *Pediatrics*. 2002; 109: 79 LP–85. <https://doi.org/10.1542/peds.109.1.79> PMID: 11773545
16. McLachlan E, Scholz H, Bolotin S, Crowcroft NS, Hatchette TF, Jackson C, et al. Calibration and Evaluation of Quantitative Antibody Titers for Varicella-Zoster Virus by Use of the BioPlex 2200. *J Clin Microbiol*. 2019; 57: <https://doi.org/10.1128/JCM.00296-19> Print 2019 Aug. e00296-19 PMID: 31167847
17. Maple PA, Gray J, Breuer J, Kafatos G, Parker S, Brown D. Performance of a time-resolved fluorescence immunoassay for measuring varicella-zoster virus immunoglobulin G levels in adults and comparison with commercial enzyme immunoassays and Merck glycoprotein enzyme immunoassay. *Clin Vaccine Immunol*. 2006; 13: 214–218. <https://doi.org/10.1128/CVI.13.2.214-218.2006> PMID: 16467328
18. Maple PA, Breuer J, Quinlivan M, Kafatos G, Brown KE. Comparison of a commercial Varicella Zoster glycoprotein IgG enzyme immunoassay with a reference time resolved fluorescence immunoassay (VZV TRFIA) for measuring VZV IgG in sera from pregnant women, sera sent for confirmatory testing and pre and post vOka. *J Clin Virol*. 2012; 53: 201–207. <https://doi.org/10.1016/j.jcv.2011.12.010> PMID: 22261123
19. Science M, Savage R, Severini A, McLachlan E, Hughes SL, Arnold C, et al. Measles Antibody Levels in Young Infants. *Pediatrics*. 2019; 144: e20190630. <https://doi.org/10.1542/peds.2019-0630> PMID: 31753911
20. CDC. Varicella Vaccination Information for Healthcare Professionals. <https://www.cdc.gov/vaccines/vpd/varicella/hcp/index.html>
21. Government of Canada. Provincial and territorial routine and catch-up vaccination schedule for infants and children in Canada. 2021. <https://www.canada.ca/en/public-health/services/provincial-territorial-immunization-information/provincial-territorial-routine-vaccination-programs-infants-children.html>
22. Australian Government. Varicella (chickenpox). 2019. <https://immunisationhandbook.health.gov.au/vaccine-preventable-diseases/varicella-chickenpox>
23. Heininger U, Desgrandchamps D, Schaad UB. Seroprevalence of Varicella-Zoster virus IgG antibodies in Swiss children during the first 16 months of age. *Vaccine*. 2006; 24: 3258–3260. <https://doi.org/10.1016/j.vaccine.2006.01.026> PMID: 16459000
24. Pinquier D, Gagneur A, Balu L, Brissaud O, Gras Le Guen C, Hau-Rainsard I, et al. Prevalence of anti-varicella-zoster virus antibodies in French infants under 15 months of age. *Clin Vaccine Immunol*. 2009/01/28. 2009; 16: 484–487. <https://doi.org/10.1128/CVI.00397-08> PMID: 19176690
25. Varicella (chickenpox) vaccine: Canadian Immunization Guide.
26. Public Health England. Guidance for issuing varicella-zoster immunoglobulin (VZIG).
27. Prevention C for DC and. Chickenpox (Varicella). <https://www.cdc.gov/chickenpox/hcp/index.html#:~:text=Recovery> from primary varicella infection, in people who are immunocompromised
28. Ontario Ministry of Health and Long-Term Care. Varicella (chickenpox). 2019.
29. Peña-Rey I, Martínez de Aragón MV, Villaverde Hueso A, Terres Arellano M, Alcalde Cabero E SRB. Epidemiología de la varicela en España en los periodos pre y post vacunación [Epidemiology of varicella in Spain pre-and post-vaccination periods]. *Rev Esp Salud Publica*. 2009; 83: 711–24.
30. Arvin AM, Koropchak CM, Wittek AE. Immunologic Evidence of Reinfection with Varicella-Zoster Virus. *J Infect Dis*. 1983; 148: 200–205. <https://doi.org/10.1093/infdis/148.2.200> PMID: 6310001

31. Duncan JR, Witkop CT, Webber BJ, Costello AA. Varicella seroepidemiology in United States air force recruits: A retrospective cohort study comparing immunogenicity of varicella vaccination and natural infection. *Vaccine*. 2017; 35: 2351–2357. <https://doi.org/10.1016/j.vaccine.2017.03.054> PMID: 28359621
32. Saiman L, LaRussa P, Steinberg SP, Zhou J, Baron K, Whittier S, et al. Persistence of immunity to varicella-zoster virus after vaccination of healthcare workers. *Infect Control Hosp Epidemiol*. 2001; 22: 279–83. <https://doi.org/10.1086/501900> PMID: 11428437
33. Behrman A, Lopez AS, Chaves SS, Watson BM, Schmid DS. Varicella immunity in vaccinated healthcare workers. *Journal of Clinical Virology*. 2013; 57: 109–114. <https://doi.org/10.1016/j.jcv.2013.01.015> PMID: 23434396
34. Trevisan A, Nicoli A, De Nuzzo D, Lago L, Artuso E, Maso S. Varicella seroepidemiology and immunization in a cohort of future healthcare workers in the pre-vaccination era. *International Journal of Infectious Diseases*. 2020; 96: 228–232. <https://doi.org/10.1016/j.ijid.2020.04.082> PMID: 32387376
35. Bianchi FP, Tafuri S, Larocca AMV, Germinario CA, Stefanizzi P. Long-term persistence of antibodies against varicella in fully immunized healthcare workers: an Italian retrospective cohort study. *BMC Infect Dis*. 2021; 21: 475. <https://doi.org/10.1186/s12879-021-06180-x> PMID: 34034659
36. Tourtelot E, Quataert S, Glantz JC, Perlis L, Muthukrishnan G, Mosmann T. Women who received varicella vaccine versus natural infection have different long-term T cell immunity but similar antibody levels. *Vaccine*. 2020; 38: 1581–1585. <https://doi.org/10.1016/j.vaccine.2019.12.067> PMID: 31959424
37. Shinefield HR, Black SB, Staehle BO, Matthews H, Adelman T, Ensor K, et al, Kaplan KM KBKPMPT for Varivax. Vaccination with measles, mumps and rubella vaccine and varicella vaccine: safety, tolerability, immunogenicity, persistence of antibody and duration of protection against varicella in healthy children. *Pediatr Infect Dis J*. 21: 555–61. <https://doi.org/10.1097/00006454-200206000-00014> PMID: 12182381
38. World Health Organization. WHO Immunological Basis for Immunization Series: Module 10: varicella-zoster. 2020. <https://www.who.int/publications/i/item/who-immunological-basis-for-immunization-series-module-10-varicella-zoster>
39. Plotkin SA. Correlates of protection induced by vaccination. *Clin Vaccine Immunol*. 2010; 17: 1055–1065. <https://doi.org/10.1128/CVI.00131-10> PMID: 20463105
40. GNANN JWW. Varicella-Zoster Virus: Prevention Through Vaccination. *Clin Obstet Gynecol*. 2012; 55. <https://doi.org/10.1097/GRF.0b013e3182510b67> PMID: 22510639
